Geographic and climatic drivers of reproductive assurance in  
*Clarkia pulchella*

Megan Bontrager<sup>1,4</sup>, Christopher D. Muir<sup>2</sup>, and Amy L. Angert<sup>3</sup>

<sup>1</sup>Department of Botany, University of British Columbia, Vancouver, British Columbia V6T  
1Z4, Canada

<sup>2</sup>Biodiversity Research Centre and Botany Department, University of British Columbia,  
Vancouver, British Columbia V6T 1Z4, Canada

<sup>3</sup>Departments of Botany and Zoology, University of British Columbia, Vancouver, British  
Columbia V6T 1Z4, Canada

<sup>4</sup>Author for correspondence (mgbontrager@gmail.com)

Declaration of authorship: MB and ALA designed the experiment. MB conducted field work and data collection. MB and CDM performed statistical analyses. MB drafted the manuscript in consultation with ALA, with feedback and assistance from CDM. All authors contributed to manuscript drafts and approved the final version of the manuscript.

## 1 Abstract

2 Climate can affect plant populations through direct effects on physiology and fitness, and through indirect  
3 effects on their relationships with pollinating mutualists. We therefore expect that geographic variation in  
4 climate might lead to variation in plant mating systems. Biogeographic processes, such as range expansion,  
5 can also contribute to geographic patterns in mating system traits. We manipulated pollinator access to  
6 plants in eight sites spanning the geographic range of *Clarkia pulchella* to investigate geographic and climatic  
7 drivers of fruits production and seed set in the absence of pollinators (reproductive assurance). We examined  
8 how reproductive assurance and fruit production varied with the position of sites within the range of the  
9 species and with temperature and precipitation. We found that reproductive assurance in *C. pulchella* was  
10 greatest in populations in the northern part of the species' range, and was not well-explained by any of  
11 the climate variables that we considered. In the absence of pollinators, some populations of *C. pulchella*  
12 have the capacity to increase fruit production, perhaps through resource reallocation, but this response is  
13 climate-dependent. Pollinators are important for reproduction in this species, and recruitment is sensitive to  
14 seed input. The degree of autonomous self-pollination that is possible in populations of this mixed-mating  
15 species may be shaped by historic biogeographic processes or variation in plant and pollinator community  
16 composition rather than variation in climate.

## 17 Keywords

18 *Clarkia*; geographic variation; pollinator exclusion; range limits; self-pollination

## 19 Introduction

20 Climate change can affect population dynamics directly by altering the survival and reproduction of individ-  
21 uals (McGraw et al., 2015). In addition to these direct effects, climate change can indirectly affect species  
22 by altering their interactions with mutualists, predators, or competitors (Miller-Struttman et al., 2015).  
23 To make informed predictions about species' responses to climate change, we must understand both direct  
24 and indirect effects. For plant species, pollinators are likely to be an important medium for these indirect  
25 effects, as the reproductive success of primarily outcrossing taxa is often highly dependent on the actions  
26 of these mutualists (Burd, 1994; Ashman et al., 2004). Changing environmental conditions can disrupt the  
27 reliability of pollination (Kudo et al., 2004). For example, changes in phenological cues might lead to mis-  
28 match between plants and pollinators (Kudo and Ida, 2013), pollinator populations may decline if they are  
29 maladapted to changing conditions (Williams et al., 2007), and the presence of invasive species can reduce

30 visitation to native plants (Bjerknes et al., 2007; Bruckman and Campbell, 2016).

31 In the face of sustained mate or resource limitation, reliance on outcross pollen can limit seed pro-  
32 duction, and selection might favour individuals with floral traits that facilitate reproductive assurance via  
33 self-pollination (Bodbyl Roels and Kelly, 2011), including traits that allow for delayed self-pollination when  
34 outcross pollen has not been delivered. Reproductive assurance is the ability to self-pollinate, either au-  
35 tonomously or with the assistance of a pollinator, in order to offset deficits in pollen delivery. Limited  
36 resources, including limited water availability, can increase the cost of producing and maintaining attractive  
37 floral displays (Galen et al., 1999). This could lead to selection for individuals that can achieve high repro-  
38 ductive success without incurring the costs of showy displays. Similarly, short flowering seasons may increase  
39 the risks of waiting for pollinator service. Some habitat characteristics, such as limited numbers of suitable  
40 growing sites, may lead to sparser or smaller populations and in turn, mate limitation. Mate limitation can  
41 also occur even when conspecific individuals are abundant if pollinators are low in abundance or prefer to  
42 visit co-occurring species (Knight et al., 2005). When temporal variability in environmental conditions is  
43 high, selection might alternatively favour plasticity that allows for increased self-pollination in response to  
44 environmental cues associated with pollen limitation (Kay and Picklum, 2013).

45 Mate and resource limitation can co-vary with climatic conditions. Therefore, patterns in mating system  
46 traits may be correlated with the climatic gradients that underlie a species' geographic distribution. While  
47 climatic conditions can exert selection on mating system and, as a result, indirectly affect demographic  
48 (Lennartsson, 2002; Moeller and Geber, 2005) and genetic processes (Eckert et al., 2010; Kramer et al.,  
49 2011), climate can also directly affect demographic components. Climatic gradients may shape variation  
50 in life history or in the sensitivity of population growth rate to a specific demographic stage, leading to  
51 measurable correlations between some fitness components and climate variables across space (Doak and  
52 Morris, 2010). Inter-annual variability in climate may also be correlated with temporal variation in vital  
53 rates within a single population (Coulson et al., 2001). Our understanding of how climate affects population  
54 dynamics will benefit from examining the relationships of multiple variables (fitness components or strengths  
55 of biotic interactions) to variation in climate.

56 Biogeographic processes can also shape mating system variation on the landscape. During range expan-  
57 sions, individuals capable of reproduction in the absence of mates or pollinators may be more likely to found  
58 new populations (Baker, 1955; Pannell et al., 2015), creating a geographic cline in mating system varia-  
59 tion, with a greater degree of self-compatibility or capacity for self-pollination near expanding or recently  
60 expanded range edges. Similar patterns might arise in regions where populations turn over frequently, where  
61 the ability to reproduce autonomously may be an important trait for individuals that are colonizing empty  
62 patches. Geographic variation in mating system may also be attributable to range overlap with pollinator

63 taxa or with plant taxa that share pollinators. In mixed-mating plants, parts of the range that overlap  
64 with a reliable pollinator community might experience little selection for self-pollination. Overlap with a  
65 competing plant species may reduce pollination success and lead to selection for self-pollination.

66 Empirical examinations of mating systems are infrequently carried out at the scale of geographic ranges  
67 (with exceptions including Busch 2005; Herlihy and Eckert 2005; Moeller and Geber 2005; Dart et al. 2011;  
68 Mimura and Aitken 2007) and investigations of geographic variation in vital rates rarely consider mating  
69 system variation. The interplay of vital rates and mating systems across geographic and climatic space may  
70 be relevant not only to population dynamics within the range, but also to the dynamics that limit geographic  
71 distributions. Across environmental gradients, mating system variation might interact with other genetic  
72 and demographic processes to influence population persistence and adaptive response. For example, while  
73 highly selfing individuals might be expected to be good colonizers, they also might have limited genetic  
74 variation for adaptation to novel environments beyond the range edge (Wright et al., 2013). Investigating  
75 range-wide variation in reproduction may shed light on climate variables that limit range expansion.

76 In this study, we investigate the relationships among climate, pollinator exclusion, and reproductive  
77 fitness components of a winter annual wildflower, *Clarkia pulchella*. In a previous study, we used herbarium  
78 specimens to examine relationships between climate, mating system, and reproductive characteristics of this  
79 species. We found that summer precipitation was positively correlated with reproductive output and that  
80 warm temperatures were correlated with traits indicative of self-pollination (Bontrager and Angert, 2016).  
81 Here, we employed field manipulations across the range of *C. pulchella* to examine whether reproductive  
82 assurance co-varies with geographic range position and/or climate. We were specifically interested in the  
83 autonomous component of reproductive assurance, that is, the ability to transfer self-pollen in the absence  
84 of a pollinator (rather than the degree to which pollinators transfer self-pollen). *C. pulchella* grows in sites  
85 that are very dry during the flowering season, particularly at the northern and southern range edges, so we  
86 expected that plants in these regions might have greater capacity to self-pollinate as a means of ensuring  
87 reproduction before drought-induced mortality. We therefore predicted that range edge populations would  
88 have greater capacity to self-pollinate in the absence of pollinators, and that this geographic pattern would  
89 be attributable to climate, in particular, drought stress during the flowering season (summer precipitation  
90 and temperature). We also sought to determine whether short-term drought relief produced consistent  
91 mating system responses across the range of *C. pulchella*. We hypothesized that drought would induce a  
92 plastic increase in self-pollination, and that as a result we would see reduced reproductive assurance when  
93 drought relief was combined with pollinator limitation. Finally, we examined how variation in pollinator  
94 availability and climate affect different components of reproduction. We anticipated that drought relief would  
95 have opposing effects on reproductive assurance and fruit production: while drought may prompt plastic

96 increases in reproductive assurance, higher water availability likely increases plant longevity and productivity  
97 during the flowering season.

## 98 **Methods**

### 99 **Study system**

100 *Clarkia pulchella* Pursh (Onagraceae) is a mixed-mating winter annual that grows east of the Cascade  
101 Mountains in the interior Pacific Northwest of North America (Figure 1). The species is found in populations  
102 ranging in size from hundreds to thousands of individuals on dry, open slopes in coniferous forest and  
103 sagebrush scrub. It is primarily outcrossed by solitary bees (Palladini and Maron, 2013) with a diverse array  
104 of other pollinators (MacSwain et al., 1973), but selfing can be facilitated by spatial and temporal proximity  
105 of fertile anthers and stigma within flowers. A large portion of the species' range is in the Okanagan Valley,  
106 which is expected to experience warmer temperatures and redistributed rainfall in the coming decades  
107 (Figure 2). Temperature increases are expected to be especially prominent in the summer months (Wang  
108 et al., 2012; Meyer et al., 2014). Anticipated changes in precipitation are variable and uncertain across the  
109 range of our focal species, with many sites expected to experience decreases in summer precipitation, but  
110 central sites projected to experience slight increases in annual precipitation (Wang et al., 2012; Meyer et al.,  
111 2014).

### 112 **Plot establishment and monitoring**

113 Experimental plots were established in eight populations on 4-9 June 2015. These sites were located in three  
114 regions across the latitudinal range of *Clarkia pulchella*, with two at the species' northern edge in southern  
115 British Columbia (Canada), three in the range center in southeastern Washington (USA), and three in the  
116 southwest portion of the species range, in Oregon (USA; Figure 1, Table S1). Our original intention was to  
117 treat the southern and western edges of the range separately and establish three sites at each edge. However,  
118 due to difficulty finding populations of sufficient size in sites where we could also obtain permits, we used  
119 just two populations in the west and one in the south. Because the climatic similarity among these sites  
120 is nearly comparable to that among sites in other regions (Figure 2), we decided to treat them as a single  
121 region, the southwest. At each site, 5-8 blocks containing four plots each were marked with 6-inch steel nails,  
122 this resulted in a total of 50 blocks and 200 plots in the experiment. Each plot consisted of a 0.8 m<sup>2</sup> area.  
123 Plots were intentionally placed with the goal of obtaining 5-20 individuals per plot, therefore the density  
124 in plots was typically higher than the overall site density. Plots were placed closer to other plots in their

125 block than to those in other blocks (with exceptions in two circumstances where low plant density meant  
126 very few suitable plot locations were available). Blocks were placed to capture variation in microhabitat  
127 characteristics across the site, and their spacing varied depending on the population size and density. Each  
128 plot was randomly assigned to one of four factorial treatment groups: control, water addition, pollinator  
129 exclusion, or both water addition and pollinator exclusion. Plots receiving water additions were at least 0.5  
130 m away from unwatered plots, except when they were downslope from unwatered plots, in which case they  
131 were sometimes closer. Plots receiving pollinator exclusion treatments were tented in bridal-veil mesh with  
132 bamboo stakes in each corner and nails tacking the mesh to the ground. Some pollinator exclusion plots had  
133 their nets partially removed by wind or cows during the flowering season ( $n = 13$  out of 100 total tented  
134 plots), so all analyses were performed without these plots.

135 The majority of the summer precipitation in these sites falls in summer storms. Plots receiving supple-  
136 mental water were watered 1-2 times during the summer (when plants were flowering) to simulate additional  
137 rainfall events. During each watering event, 15 mm of water was added to each plot (9.6 L per plot). This  
138 approximated the typical precipitation of a summer rainfall event based on data from Wang et al. (2012), and  
139 in an average year, would have increased the total summer precipitation in these plots by 30-70%. However,  
140 our experiment was conducted during a drought year (Figure 2), therefore, in the central sites, plots receiving  
141 water additions still fell short of average summer precipitation levels. In southwestern and northern sites,  
142 the water addition likely raised the summer precipitation amount slightly above the historic average. In all  
143 sites, we consider the water additions to represent a drought relief treatment, because unwatered plots were  
144 already experiencing natural drought. The first watering was performed when the experiment was set up.  
145 The second watering was performed 22-25 June 2015, except at two sites (SW3, C1), which had completed  
146 flowering and fruiting at that time. Efficacy of the water addition treatment was checked by measuring the  
147 soil water content with a probe (Hydrosense, Campbell Scientific Inc.) before and after water additions.  
148 Prior to water additions, there were no significant differences between plots receiving a water addition treat-  
149 ment and those not receiving this treatment (linear mixed effects model with a random effect of site and  
150 a fixed effect of water addition treatment; first watering:  $P = 0.839$  (7 of 8 sites were measured); second  
151 watering:  $P = 0.277$  (5 of 8 sites were measured)). Shortly after watering (within one hour), plots receiving  
152 a water addition treatment had higher soil moisture than those not receiving treatment (first watering:  $P$   
153  $< 0.0001$ , average soil moisture of unwatered plots = 11.0% , watered plots 22.2%; second watering:  $P =$   
154  $0.0001$ , average soil moisture of unwatered plots 3.7%, watered plots 11.5%).

155 When flowering and fruiting were complete, we counted the number of plants in each plot and the number  
156 of fruits on each plant, and estimated the average number of seeds per fruit. The number of plants in each  
157 plot ranged from 1-43 (mean = 7.9, median = 7). We counted the number of fruits per plant on every plant

158 in each plot, as a proxy for the number of flowers per plant (aborted fruits were rare overall). Plants that  
159 had died before producing any flowers were not included in our analyses. Some plants ( $n = 14$ , 0.7% of all  
160 plants counted) had experienced major damage prior to our final census making fruit counting impossible,  
161 so they were assigned the average number of fruits per plant in that plot type at that site for estimation of  
162 plot-level seed input, but we excluded them from analyses of fruit counts. Other plants ( $n = 25$ , 1.4% of  
163 all plants counted) still had flowers at the time of the final census. It was assumed that these flowers would  
164 ripen into fruits, so they were included in the fruit counts. When possible, up to four fruits per plot (average  
165 number of fruits per plot = 3.67) were collected for seed counting. After counting, seeds were returned to  
166 the plots that they were collected from by sprinkling them haphazardly over the plot from a 10 cm height.  
167 In 3 of 200 plots, no intact fruits were available for seed counting (all had dehisced), so these plots were  
168 excluded from analyses of seed set and plot-level seed input, but included in analyses of fruit counts. To  
169 assess the subsequent effects of pollinator limitation on populations in the following year, we revisited plots  
170 on 21-24 June and 29-31 July 2016 and counted the number of mature plants present in each. Some plot  
171 markers were missing, but we were able to relocate 182 of our 200 plots.

## 172 **Climate variable selection**

173 We expect long-term climatic conditions, particularly those that might contribute to drought stress, to  
174 influence selection for autonomous selfing. Concurrent work with *C. pulchella* (M. Bontrager, unpublished  
175 data) has indicated that fall, winter, and spring growing conditions play a large role in overall plant growth  
176 and reproductive output, therefore we considered not only flowering season (June-July) climate variables but  
177 also annual temperature and precipitation for inclusion as predictors. We obtained 50-year climate normals  
178 (1963-2012) from ClimateWNA (Wang et al., 2012) and climate data during the study from PRISM (PRISM  
179 Climate Group, Oregon State University, prism.oregonstate.edu, downloaded 10 October 2016). Our selected  
180 set of climatic variables included annual temperature normals (MAT), annual precipitation normals (MAP),  
181 summer temperature during the experiment, and summer precipitation during the experiment. Among these,  
182 MAT and precipitation during the experiment were correlated ( $r = -0.84$ ). A full set of annual and seasonal  
183 variable correlations is presented in Table S2.

## 184 **Statistical analyses**

185 We used generalized linear mixed effects models (GLMMs) to evaluate the effects of pollinator exclusion,  
186 region, and each of the selected climate variables on reproductive assurance and fruits per plant. Initial  
187 data exploration indicated that our watering treatment did not have a strong or consistent biological effect

188 (Figure S1, Figure S2), so we omitted this factor from our analyses to keep models simple and facilitate  
189 interpretation of interactions between the other factors. For each predictor variable of interest (the four  
190 climate variables and region), we built a model with a two-way interaction between this variable and pol-  
191 linator exclusion on both seed counts and fruit counts. We used negative binomial GLMMs for both seeds  
192 and fruits, and we included a zero-inflation parameter when modeling seed counts. In all models we included  
193 random effects of blocks nested within sites. Because our data do not contain true zero fruit counts (i.e.,  
194 we did not include plants that did not survive to produce fruits, so all plants in our dataset produced at  
195 least one fruit), we subtracted one from all counts of fruits per plant prior to analysis in order to better  
196 conform to the assumptions of the negative binomial model. All climate predictors were scaled prior to  
197 analyses by subtracting their mean and dividing by their standard deviation. We evaluated the relationship  
198 between total plot-level seed production in 2015 and the number of plants present in each plot in summer of  
199 2016 using a GLMM with a negative binomial distribution and random effects of block nested within site.  
200 All models were built in R (R Core Team, 2017) using the package glmmTMB (Brooks et al., 2017) and  
201 predictions, averaged across random effects, were visualized using the package ggeffects (Lüdtke, 2018).

## 202 Results

### 203 Variation in response to pollinator limitation across the range

204 In all regions, *Clarkia pulchella* produced fewer seeds in the absence of pollinators (Table 1). Climatic or  
205 geographic drivers of variation in reproductive assurance were indicated by our models of seeds per fruit  
206 when there was a significant interaction between pollinator exclusion and region or pollinator exclusion and  
207 a given climate variable. We found that reproductive assurance varied by region, with greater rates of  
208 reproductive assurance in northern populations (Figure 3, Table 1). We did not find any strong effects of  
209 climate on seed production or reproductive assurance (Table 1). However, there was a marginally significant  
210 interaction between mean annual precipitation (MAP) and pollinator exclusion: populations in historically  
211 wetter sites tended to be more negatively affected by pollinator exclusion (i.e., populations in drier sites  
212 had slightly higher rates of reproductive assurance) (Table 1). This could be a causal relationship, or the  
213 correlation could have been driven by the high degree of reproductive assurance in the northern part of the  
214 range, which has low MAP. If low MAP was really a driver of reproductive assurance, we might expect to  
215 have seen a greater degree of reproductive assurance in the southwestern sites, which also have low MAP.  
216 However, this was not the case in our data.



## 217 **Response of patch density to seed production in the previous year**

218 Across sites, there was a positive relationship between the number of seeds produced in a plot in 2015 and  
219 the number of adult plants present in 2016 ( $P < 0.0001$ ,  $\beta = 0.00044$ ,  $SE = 0.000061$ ). This is not simply  
220 a result of plots with large numbers of plants in 2015 being similarly dense in 2016, because seed input  
221 was decoupled from plant density in 2015 by the pollinator exclusion treatments. The effect of seed input  
222 remained significant ( $P < 0.0001$ ) when the number of plants in 2015 was included in the model as a covariate  
223 (results not shown).

## 224 **Variation in fruit production across the range**

225 Plants in the north produced more fruits (on average 4.0, compared to 1.5 and 1.7 in the center and southwest,  
226 respectively; Table 2, Figure 4). This regional trend could be due to the relatively lower normal annual  
227 temperatures in the northern sites (Figure 2), the effects of which are discussed below. Pollinator exclusion  
228 tended to result in a slight increase in fruit production, possibly due to reallocation of resources within a plant  
229 in order to produce more flowers when ovules are left unfertilized (Table 2). This effect was small—plants  
230 in plots without pollinators produced an additional 0.4 fruits, on average.

231 We found that the effects of pollinator exclusion on fruit production depended upon the amount of summer  
232 precipitation during the experiment (Table 2, Figure 5). Fruit production was higher in wetter sites, and  
233 pollinator-excluded plants that were in the wettest sites showed a greater positive effect of pollinator exclusion  
234 on fruit production (Table 2). However, it should be noted that while both the main effect of climate and  
235 its interaction with pollinator exclusion were significant, the difference between plots with and without  
236 pollinators in wetter sites did not appear to be particularly strong, and when visualized the confidence  
237 intervals were largely overlapping (Figure 5A). We also found a main effect of mean annual temperature  
238 (MAT) on fruit production (Table 2). Fruit production was higher in cooler sites (Figure 5B). Disentangling  
239 these two climatic drivers of increased fruit production is not possible with this dataset, however, because  
240 summer precipitation during the experiment was negatively correlated with normal MAT. Therefore, it could  
241 have been either higher water resources during flowering or cooler temperatures over the growing season that  
242 resulted in increased fruit production. It is worth noting, however, that summer temperature during the  
243 experiment was not correlated with either of these variables, so if temperature was the driver of this pattern,  
244 it was likely because of temperature effects on earlier life-history stages.

## 245 Discussion

246 Pollinator exclusion in eight populations of *Clarkia pulchella* revealed increased autonomous reproductive  
247 assurance in populations in the northern part of the species' range, as compared to the center or southwest.  
248 Plants in the northern part of the species' range also produced more fruits. Fruit production was higher  
249 in sites that are cooler or that received higher amounts of precipitation during the experiment. Plants  
250 also produced slightly more fruits in response to pollinator exclusion, however, this reallocation was not, in  
251 general, large enough to offset the reduction in seed production caused by pollen limitation.

### 252 Reproductive assurance is driven by geography rather than climate

253 Pollinator limitation reduced reproduction across the range of *C. pulchella*. Contrary to our prediction,  
254 we did not observe plastic responses of decreased reproductive assurance in response to our water addition  
255 treatment, or in sites with high summer precipitation during the experiment. There is some indication that  
256 plants in sites with lower average precipitation may have adapted to have greater reproductive assurance  
257 (Table 1), perhaps due to shorter season lengths or because gradients in pollinator abundance may be  
258 driven by water availability. However, increased reproductive assurance is only apparent at the northern  
259 range edge (Figure 3) despite the fact that mean annual precipitation is lower at both the northern and  
260 southwestern range edges. This trend persists even after accounting for regional differences in seed set in  
261 control plots, i.e., when reproductive assurance is represented as a proportion of the average seed set in  
262 control plots (data not shown). In light of this, we suggest that for this species, reproductive assurance is  
263 better explained by the latitudinal position of populations relative to the range than by any single climate  
264 variable. The locations of our northern populations were covered by the Cordilleran ice sheet during the  
265 last glacial maximum; the patterns we see could be the result of a post-glacial range expansion, in which  
266 the founders of these northern populations were individuals who had a greater capacity for autonomous  
267 reproduction. It is possible that during colonization there is a low probability of pollinators foraging on a  
268 novel plant species and moving conspecific pollen between sparse individuals. Reproductive assurance has  
269 evolved in other species when populations have experienced historic bottlenecks (Busch, 2005), and contrasts  
270 of species' range sizes indicate that species capable of autonomous self-pollination have a greater ability to  
271 colonize new sites (Randle et al., 2009). While latitude is not a strong predictor of among-species variation  
272 in mating system (Moeller et al., 2017), within-species variation may be more closely tied to postglacial  
273 colonization routes.

274 An alternative possibility is that our northern sites are distinct because they differ in community com-  
275 position from sites in other parts of the range. These community differences could be in the regional suite

276 of pollinators. A survey of *Clarkia* pollinators in western North America (MacSwain et al., 1973) notes  
277 that visitors to *C. pulchella* differ from the characteristic groups that visit more southern members of the  
278 genus, and it is possible that a similar gradient in pollinator communities exists within the geographic range  
279 of *C. pulchella*. Similarly, co-occurring plant species can influence pollinator availability and deposition of  
280 conspecific pollen on a focal species (Palladini and Maron, 2013), and it is possible that populations in the  
281 northern portion of the range have adapted to a different pollination environment caused by overlap with  
282 different plant species.

283 Across the range, adult plant density was positively correlated with seed production in the previous year.  
284 Because our pollinator exclusion treatment led to plot-level seed input being decoupled from the number  
285 of plants in 2015 (data not shown), we can attribute differences in 2016 plant density to seed input, rather  
286 than to patch quality. Seed production is important enough to have an effect on subsequent density despite  
287 differences between plots in the availability of germination sites or the probability of survival to flowering.  
288 This, in combination with the consistent negative reproductive response to pollinator exclusion, indicates  
289 that populations would likely be negatively impacted by disruption of pollinator service.

## 290 **Reallocation to flower and fruit production under pollen limitation**

291 Either cool temperatures during the growing season, high summer precipitation, or a combination of the two  
292 increase overall fruit production. Germination of *C. pulchella* is inhibited under warm temperatures (Lewis,  
293 1955), so plants in sites with cooler fall temperatures could have earlier germination timing and develop  
294 larger root systems, giving them access to more resources during the flowering season. *Clarkia pulchella*  
295 individuals appear to be capable of reallocating some resources to flower production when pollen is limited  
296 (Table 2). Our finding of a modest amount of reallocation under pollinator exclusion contrasts with work in  
297 another *Clarkia* species, *C. xantiana* ssp. *parviflora*, which found that individuals do not reallocate resources  
298 based on the quantity of pollen received (Briscoe Runquist and Moeller, 2013). These contrasting results  
299 can potentially be explained by two factors. First, the focal species of our study produces buds continuously  
300 over the flowering season, while *C. xantiana* ssp. *parviflora* produces nearly all of its buds at the beginning  
301 of the flowering season, leaving individuals little opportunity to respond to the pollination environment  
302 (Briscoe Runquist and Moeller, 2013). Second, their study investigated differences between plants under  
303 natural pollination conditions and plants receiving supplemental pollen, while we compared plants under  
304 natural pollination and plants under strong pollen limitation. These differences in direction and magnitude  
305 of the treatments imposed may affect the degree to which a plant reallocation response can be detected. An  
306 alternative explanation for the apparent resource reallocation is that our pollinator exclusion tents protected

307 plants from herbivores that might have removed fruits in the control plots. While herbivory of individual  
308 fruits (rather than entire plants) appears rare (M. Bontrager, personal observation), we can not rule out the  
309 possibility of an herbivore effect.

## 310 **Implications for responses to climate change**

311 If we assume that the correlations we found between traits and climate across sites can be generally extrap-  
312 olated to future climates and future responses, our results would suggest that the projected temperature  
313 increases in coming decades (Figure 2) will have negative effects on reproduction via negative effects on fruit  
314 set (Figure 5B). However, it is important to be cautious about inferring future responses from current spatial  
315 patterns (Warren et al., 2014). Common garden experiments in the field and growth chamber (M. Bontrager,  
316 unpublished data; Gamble et al., 2018) indicate that populations of *C. pulchella* are differentiated based on  
317 climate of origin, therefore population responses to changes in climate are likely to be individualized and will  
318 depend not only on a population's current climate optimum, but also its capacity for adaptive and plastic  
319 responses.

## 320 **Conclusions and future directions**

321 Populations of *Clarkia pulchella* from across the species' range are reliant on pollinator service to maintain  
322 high levels of seed production, which is likely an important demographic transition for this species. Our data  
323 support the hypothesis that population in areas of the range that have undergone post-glacial expansion may  
324 have elevated levels of reproductive assurance, but alternative drivers of this pattern remain plausible. Future  
325 work should explore these drivers, and could begin by examining geographic variation in the phenology,  
326 abundance, and composition of pollinator communities, as well as the responses of these communities to  
327 changes in climatic conditions. In order to better understand how *C. pulchella* might respond to changes  
328 in pollinator service, future work should measure the capacity of populations to evolve higher rates of self-  
329 pollination in the absence of pollinators.

## 330 **Acknowledgements**

331 We would like to thank B. Harrower, R. Germain, and members of the Angert lab for their thoughtful  
332 comments on this project. E. Fitz assisted with fieldwork. Permission to work in our field sites was granted  
333 by British Columbia Parks, Umatilla National Forest, Ochoco National Forest, and the Vale District Bureau  
334 of Land Management. MB was supported by a University of British Columbia Four-year Fellowship.

## 335 Data accessibility

336 Data and code are available on Github at <https://github.com/meganbontrager/clarkia-reproductive-assurance>.

337 Upon publication, all data and code will be archived on Dryad.

## 338 Conflict of interest

339 The authors declare that they have no conflict of interest.

## 340 References

- 341 Ashman, T.-L., T. M. Knight, J. A. Steets, P. Amarasekare, M. Burd, D. R. Campbell, M. R. Dudash, M. O.  
342 Johnston, S. J. Mazer, R. J. Mitchell, et al. (2004). Pollen limitation of plant reproduction: ecological and  
343 evolutionary causes and consequences. *Ecology* 85(9), 2408–2421. 2
- 344 Baker, H. G. (1955). Self-compatibility and establishment after ‘long-distance’ dispersal. *Evolution* 9(3),  
345 347–349. 3
- 346 Bjercknes, A.-L., Ø. Totland, S. J. Hegland, and A. Nielsen (2007). Do alien plant invasions really affect  
347 pollination success in native plant species? *Biological conservation* 138(1), 1–12. 3
- 348 Bodbyl Roels, S. A. and J. K. Kelly (2011). Rapid evolution caused by pollinator loss in *Mimulus guttatus*.  
349 *Evolution* 65(9), 2541–2552. 3
- 350 Bontrager, M. and A. L. Angert (2016). Effects of range-wide variation in climate and isolation on floral  
351 traits and reproductive output of *Clarkia pulchella*. *American Journal of Botany* 103(1), 10–21. 4
- 352 Briscoe Runquist, R. D. and D. A. Moeller (2013). Resource reallocation does not influence estimates of  
353 pollen limitation or reproductive assurance in *Clarkia xantiana* subsp. *parviflora* (Onagraceae). *American*  
354 *Journal of Botany* 100(9), 1916–1921. 11
- 355 Brooks, M. E., K. Kristensen, K. J. van Benthem, A. Magnusson, C. W. Berg, A. Nielsen, H. J. Skaug,  
356 M. Machler, and B. M. Bolker (2017). glmmTMB balances speed and flexibility among packages for  
357 zero-inflated generalized linear mixed modeling. *The R Journal* 9(2), 378–400. 8
- 358 Bruckman, D. and D. R. Campbell (2016). Pollination of a native plant changes with distance and density  
359 of invasive plants in a simulated biological invasion. *American journal of botany* 103(8), 1458–1465. 3

- 360 Burd, M. (1994). Principle and plant reproduction: the role of pollen limitation in fruit and seed set. *The*  
361 *Botanical Review* 60(1), 83–139. 2
- 362 Busch, J. W. (2005). The evolution of self-compatibility in geographically peripheral populations of *Leaven-*  
363 *worthia alabamica* (Brassicaceae). *American Journal of Botany* 92(9), 1503–1512. 4, 10
- 364 Coulson, T., E. A. Catchpole, S. D. Albon, B. J. Morgan, J. Pemberton, T. H. Clutton-Brock, M. Craw-  
365 ley, and B. Grenfell (2001). Age, sex, density, winter weather, and population crashes in Soay sheep.  
366 *Science* 292(5521), 1528–1531. 3
- 367 Dart, S. R., K. E. Samis, E. Austen, and C. G. Eckert (2011). Broad geographic covariation between  
368 floral traits and the mating system in *Camissoniopsis cheiranthifolia* (Onagraceae): multiple stable mixed  
369 mating systems across the species' range? *Annals of Botany* 109(3), 599–611. 4
- 370 Doak, D. F. and W. F. Morris (2010). Demographic compensation and tipping points in climate-induced  
371 range shifts. *Nature* 467(7318), 959. 3
- 372 Eckert, C. G., S. Kalisz, M. A. Geber, R. Sargent, E. Elle, P.-O. Cheptou, C. Goodwillie, M. O. Johnston,  
373 J. K. Kelly, D. A. Moeller, et al. (2010). Plant mating systems in a changing world. *Trends in Ecology &*  
374 *Evolution* 25(1), 35–43. 3
- 375 Galen, C., R. A. Sherry, and A. B. Carroll (1999). Are flowers physiological sinks or faucets? costs and  
376 correlates of water use by flowers of *Polemonium viscosum*. *Oecologia* 118(4), 461–470. 3
- 377 Gamble, D. E., M. Bontrager, and A. L. Angert (2018). Floral trait variation and links to climate in the  
378 mixed-mating annual *Clarkia pulchella*. *Botany* (ja). 12
- 379 Herlihy, C. R. and C. G. Eckert (2005). Evolution of self-fertilization at geographical range margins? a  
380 comparison of demographic, floral, and mating system variables in central vs. peripheral populations of  
381 *Aquilegia canadensis* (Ranunculaceae). *American Journal of Botany* 92(4), 744–751. 4
- 382 Kay, K. M. and D. A. Picklum (2013). Drought alters the expression of mating system traits in two species  
383 of *Clarkia*. *Evolutionary Ecology* 27(5), 899–910. 3
- 384 Knight, T. M., J. A. Steets, J. C. Vamosi, S. J. Mazer, M. Burd, D. R. Campbell, M. R. Dudash, M. O.  
385 Johnston, R. J. Mitchell, and T.-L. Ashman (2005). Pollen limitation of plant reproduction: pattern and  
386 process. *Annual Review of Ecology, Evolution, and Systematics* 36, 467–497. 3

- 387 Kramer, A. T., J. B. Fant, and M. V. Ashley (2011). Influences of landscape and pollinators on population  
388 genetic structure: examples from three *Penstemon* (Plantaginaceae) species in the Great Basin. *American*  
389 *Journal of Botany* 98(1), 109–121. 3
- 390 Kudo, G. and T. Y. Ida (2013). Early onset of spring increases the phenological mismatch between plants  
391 and pollinators. *Ecology* 94(10), 2311–2320. 2
- 392 Kudo, G., Y. Nishikawa, T. Kasagi, and S. Kosuge (2004). Does seed production of spring ephemerals  
393 decrease when spring comes early? *Ecological Research* 19(2), 255–259. 2
- 394 Lennartsson, T. (2002). Extinction thresholds and disrupted plant–pollinator interactions in fragmented  
395 plant populations. *Ecology* 83(11), 3060–3072. 3
- 396 Lewis, H. (1955). The genus *Clarkia*. *University of California Publications in Botany* 28, 241–392. 11
- 397 Lüdtke, D. (2018). *ggeffects: Create tidy data frames of marginal effects for 'ggplot' from model outputs*. R  
398 package version 0.3.2. 8
- 399 MacSwain, J. W., P. H. Raven, and R. W. Thorp (1973). Comparative behavior of bees and Onagraceae: 4.  
400 *Clarkia* bees of the Western United States. *University of California Publications in Entomology* 70. 5, 11
- 401 McGraw, J. B., J. B. Turner, S. Souther, C. C. Bennington, M. C. Vavrek, G. R. Shaver, and N. Fetcher  
402 (2015). Northward displacement of optimal climate conditions for ecotypes of *Eriophorum vaginatum* L.  
403 across a latitudinal gradient in Alaska. *Global Change Biology* 21(10), 3827–3835. 2
- 404 Meyer, L., S. Brinkman, L. van Kesteren, N. Leprince-Ringuet, and F. van Boxmeer (2014). IPCC Climate  
405 Change 2014: Synthesis report. contribution of working groups I, II and III to the fifth assessment report  
406 of the Intergovernmental Panel on Climate Change. pp. 3–87. 5
- 407 Miller-Struttman, N. E., J. C. Geib, J. D. Franklin, P. G. Kevan, R. M. Holdo, D. Ebert-May, A. M. Lynn,  
408 J. A. Kettenbach, E. Hedrick, and C. Galen (2015). Functional mismatch in a bumble bee pollination  
409 mutualism under climate change. *Science* 349(6255), 1541–1544. 2
- 410 Mimura, M. and S. Aitken (2007). Adaptive gradients and isolation-by-distance with postglacial migration  
411 in *Picea sitchensis*. *Heredity* 99(2), 224. 4
- 412 Moeller, D. A., R. D. Briscoe Runquist, A. M. Moe, M. A. Geber, C. Goodwillie, P.-O. Cheptou, C. G.  
413 Eckert, E. Elle, M. O. Johnston, S. Kalisz, et al. (2017). Global biogeography of mating system variation  
414 in seed plants. *Ecology Letters* 20(3), 375–384. 10

- 415 Moeller, D. A. and M. A. Geber (2005). Ecological context of the evolution of self-pollination in *Clarkia*  
416 *xantiana*: population size, plant communities, and reproductive assurance. *Evolution* 59(4), 786–799. 3,  
417 4
- 418 Palladini, J. D. and J. L. Maron (2013). Indirect competition for pollinators is weak compared to direct  
419 resource competition: pollination and performance in the face of an invader. *Oecologia* 172(4), 1061–1069.  
420 5, 11
- 421 Pannell, J. R., J. R. Auld, Y. Brandvain, M. Burd, J. W. Busch, P.-O. Cheptou, J. K. Conner, E. E. Goldberg,  
422 A.-G. Grant, D. L. Grossenbacher, et al. (2015). The scope of Baker’s law. *New Phytologist* 208(3), 656–  
423 667. 3
- 424 R Core Team (2017). *R: a language and environment for statistical computing, version 3.4.4*. Vienna,  
425 Austria: R Foundation for Statistical Computing. 8
- 426 Randle, A. M., J. B. Snyder, and S. Kalisz (2009). Can differences in autonomous selfing ability explain  
427 differences in range size among sister-taxa pairs of *Collinsia* (Plantaginaceae)? an extension of Baker’s  
428 Law. *New Phytologist* 183(3), 618–629. 10
- 429 Wang, T., A. Hamann, D. L. Spittlehouse, and T. Q. Murdock (2012). ClimateWNA: high-resolution spatial  
430 climate data for western North America. *Journal of Applied Meteorology and Climatology* 51(1), 16–29.  
431 5, 6, 7, 20, 25
- 432 Warren, D. L., M. Cardillo, D. F. Rosauer, and D. I. Bolnick (2014). Mistaking geography for biology:  
433 inferring processes from species distributions. *Trends in Ecology & Evolution* 29(10), 572–580. 12
- 434 Williams, P. H., M. B. Araújo, and P. Rasmont (2007). Can vulnerability among British bumblebee (*Bombus*)  
435 species be explained by niche position and breadth? *Biological Conservation* 138(3), 493–505. 2
- 436 Wright, S. I., S. Kalisz, and T. Slotte (2013). Evolutionary consequences of self-fertilization in plants. *Proc.*  
437 *R. Soc. B* 280(1760), 20130133. 4



**Table 1** Effects of pollinator exclusion, region, and climate on seed set per fruit. Estimates, standard errors, and *P*-values are from zero-inflated negative binomial GLMMs. Effects of being in the northern or southwestern region are expressed relative to central populations. Significant main effects and interactions are indicated with bold font.

| Climate/region predictor    |           | Climate/region |       |                 | Pollinator exclusion |              |                 | Climate/region x pollinator exclusion |              |                 |
|-----------------------------|-----------|----------------|-------|-----------------|----------------------|--------------|-----------------|---------------------------------------|--------------|-----------------|
|                             |           | $\beta$        | SE    | <i>P</i> -value | $\beta$              | SE           | <i>P</i> -value | $\beta$                               | SE           | <i>P</i> -value |
| Region                      | North     | 0.219          | 0.155 | 0.157           | <b>-0.987</b>        | <b>0.112</b> | < <b>0.001</b>  | <b>0.371</b>                          | <b>0.159</b> | <b>0.020</b>    |
|                             | Southwest | -0.217         | 0.139 | 0.119           |                      |              |                 | 0.098                                 | 0.153        | 0.523           |
| Mean annual precipitation   |           | 0.046          | 0.098 | 0.635           | <b>-0.834</b>        | <b>0.066</b> | < <b>0.001</b>  | -0.111                                | 0.064        | 0.086           |
| Mean annual temperature     |           | -0.084         | 0.090 | 0.348           | <b>-0.827</b>        | <b>0.066</b> | < <b>0.001</b>  | -0.038                                | 0.062        | 0.541           |
| Summer precipitation (2015) |           | 0.031          | 0.096 | 0.747           | <b>-0.825</b>        | <b>0.066</b> | < <b>0.001</b>  | -0.019                                | 0.063        | 0.763           |
| Summer temperature (2015)   |           | 0.037          | 0.093 | 0.688           | <b>-0.840</b>        | <b>0.067</b> | < <b>0.001</b>  | 0.105                                 | 0.065        | 0.105           |

**Table 2** Effects of pollinator exclusion, region, and climate on fruit number. Estimates, standard errors, and *P*-values are from negative binomial GLMMs. Effects of being in the northern or southwestern region are expressed relative to central populations. Significant main effects and interactions are indicated with bold font.

| Climate/region predictor    |           | Climate/region |              |                 | Pollinator exclusion |              |                 | Climate/region x pollinator exclusion |              |                 |
|-----------------------------|-----------|----------------|--------------|-----------------|----------------------|--------------|-----------------|---------------------------------------|--------------|-----------------|
|                             |           | $\beta$        | SE           | <i>P</i> -value | $\beta$              | SE           | <i>P</i> -value | $\beta$                               | SE           | <i>P</i> -value |
| Region                      | North     | <b>1.156</b>   | <b>0.442</b> | <b>0.009</b>    | <b>0.302</b>         | <b>0.096</b> | <b>0.002</b>    | -0.272                                | 0.146        | 0.063           |
|                             | Southwest | 0.001          | 0.399        | 0.997           |                      |              |                 | -0.153                                | 0.151        | 0.309           |
| Mean annual precipitation   |           | -0.126         | 0.236        | 0.594           | <b>0.178</b>         | <b>0.062</b> | <b>0.004</b>    | 0.020                                 | 0.064        | 0.752           |
| Mean annual temperature     |           | <b>-0.454</b>  | <b>0.148</b> | <b>0.002</b>    | <b>0.154</b>         | <b>0.063</b> | <b>0.014</b>    | -0.118                                | 0.066        | 0.072           |
| Summer precipitation (2015) |           | 0.281          | 0.206        | 0.172           | <b>0.148</b>         | <b>0.062</b> | <b>0.017</b>    | <b>0.211</b>                          | <b>0.068</b> | <b>0.002</b>    |
| Summer temperature (2015)   |           | -0.253         | 0.201        | 0.209           | <b>0.174</b>         | <b>0.062</b> | <b>0.005</b>    | -0.033                                | 0.066        | 0.617           |

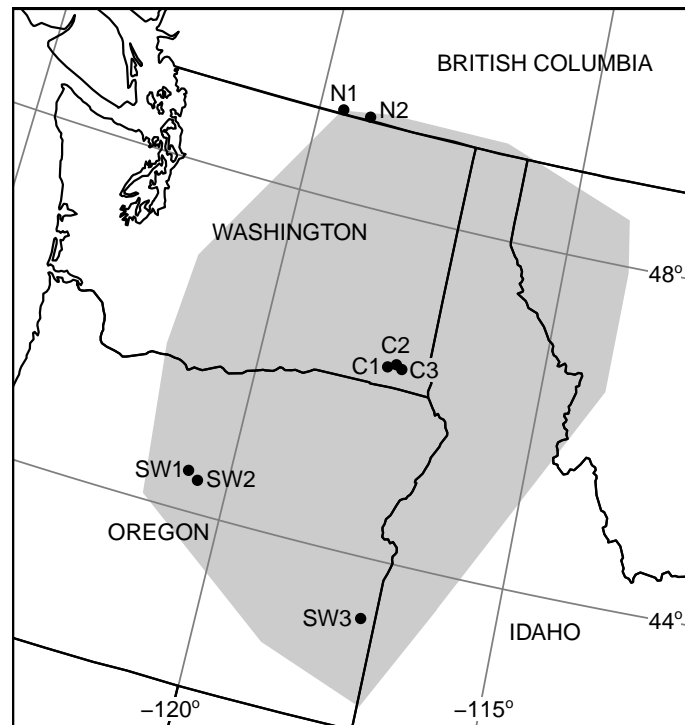

**Fig. 1.** Experimental sites relative to the geographic range of *Clarkia pulchella* (shaded area). N1 and N2 are northern sites; S1, S2, and S3 are southwestern sites, and C1, C2, and C3 are central sites. For geographic coordinates and elevations, see Table S1.

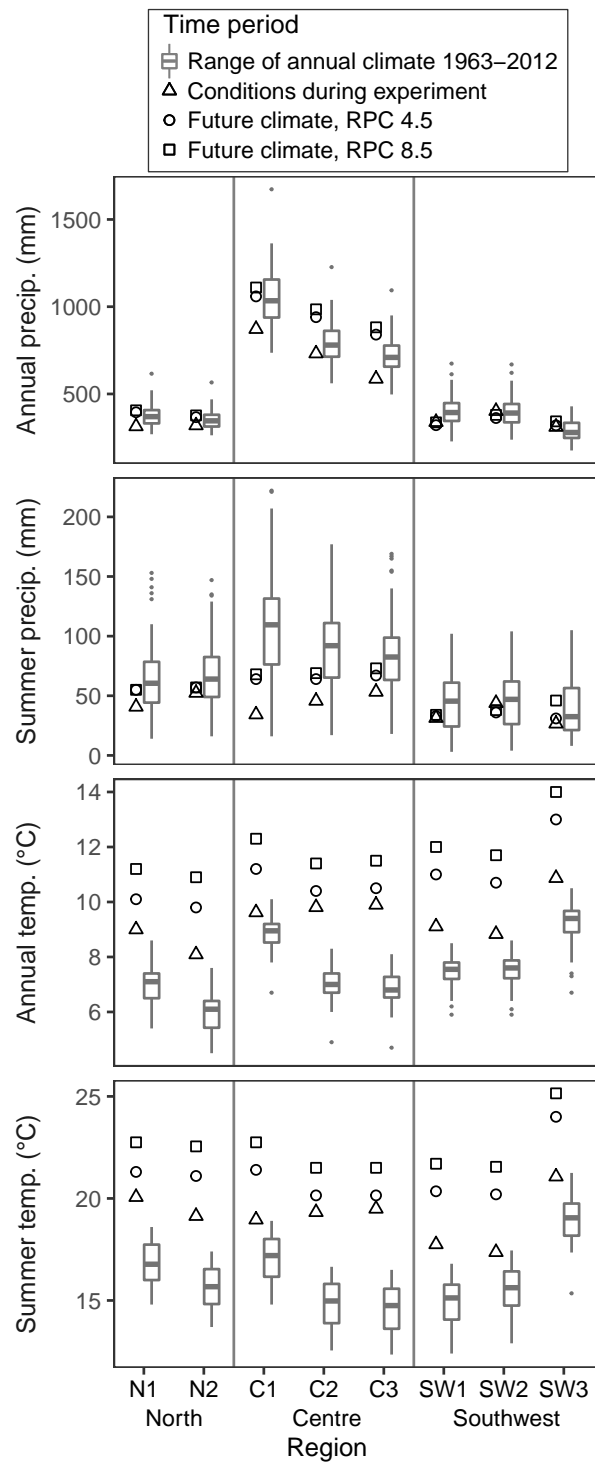

**Fig. 2.** Climate conditions in experimental sites in each region. Boxplots summarize annual values over a 50-year time window (1963–2012). Triangles represent conditions during the experiment. Also shown are climate projections for 2055 under two different emissions scenarios (circles: CanESM RCP 4.5; squares: CanESM RCP 8.5). Historic and future values extracted from ClimateWNA (Wang et al., 2012), weather during the experiment was downloaded from PRISM (PRISM Climate Group, Oregon State University, [prism.oregonstate.edu](http://prism.oregonstate.edu)).

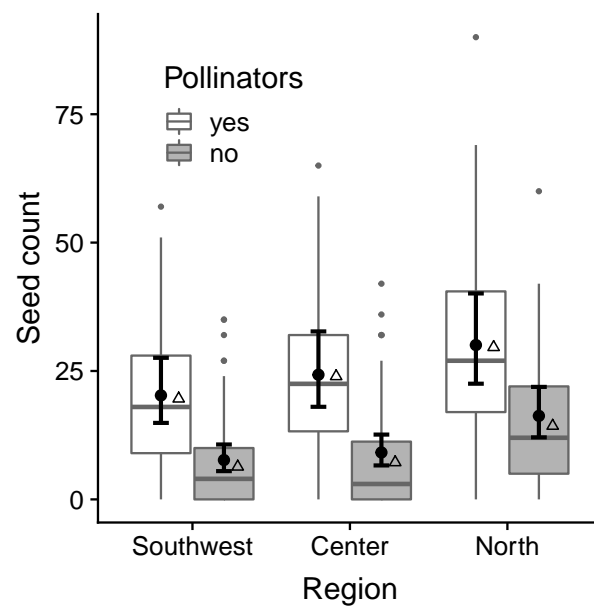

**Fig. 3.** Seeds per fruit in plots with and without pollinators in each of three geographic regions within the range of *Clarkia pulchella*. Boxplots show the median, first and third quartiles, and range of the raw data; black points and error bars show the model-fitted means and 95% confidence intervals; open triangles are raw means of the data.

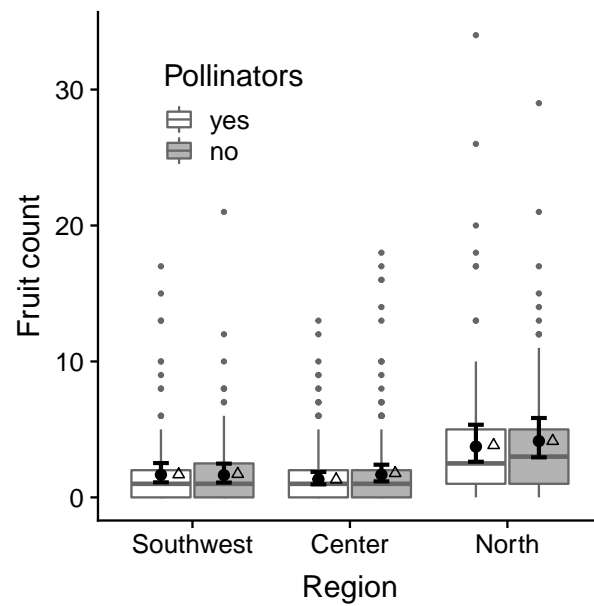

**Fig. 4.** Fruits per plant in plots with and without pollinators in each of three geographic regions within the range of *Clarkia pulchella*. Boxplots show the median, first and third quartiles, and range of the raw data; black points and error bars show the model-fitted means and 95% confidence intervals; open triangles are raw means of the data.

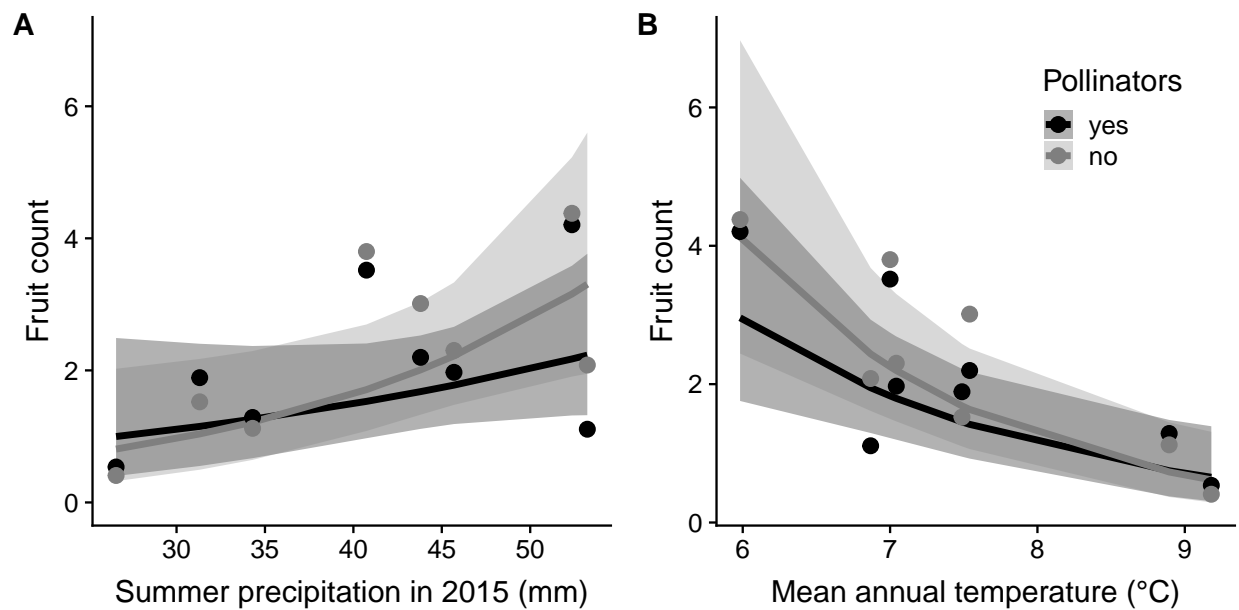

**Fig. 5.** (A) Effects of summer precipitation during the experiment (2015) and pollinator exclusion on per-plant fruit production. (B) Effects of mean annual temperature (1963-2012) and pollinator exclusion on per-plant fruit production. Average per-plant fruit counts in plots with and without pollinators are also plotted. Lines represent model predictions; shaded areas represent 95% confidence intervals. Each pair of stacked dots represent raw means of plants with (black) and without pollinators (grey) in a site.

**Table S1** Geographic data for experimental sites. Coordinates are given in decimal degrees. Abbreviations match Figure 1.

| Name        | Abbreviation | Latitude | Longitude | Elevation (m) |
|-------------|--------------|----------|-----------|---------------|
| Southwest 1 | SW1          | 44.47    | -120.71   | 1128          |
| Southwest 2 | SW2          | 44.38    | -120.52   | 1134          |
| Southwest 3 | SW3          | 43.30    | -117.27   | 1043          |
| Center 1    | C1           | 46.24    | -117.74   | 1022          |
| Center 2    | C2           | 46.28    | -117.60   | 1457          |
| Center 3    | C3           | 46.24    | -117.49   | 1445          |
| North 1     | N1           | 49.05    | -119.56   | 842           |
| North 2     | N2           | 49.04    | -119.05   | 866           |



**Table S2** Pearson correlation coefficients among precipitation and temperature variables associated with experimental sites. For **(A)** precipitation, **(B)** temperature, and **(C)** precipitation and temperature, correlations are shown between annual, fall (September-November), winter (December-February), spring (March-May), and summer (June-July, because all plants senesce before August). Normal values were calculated over 50 years (1963-2012), while 2014-2015 values are from the growing season of plants in the experiment. Normal climate data is from ClimateWNA (Wang et al., 2012) and 2014-2015 variables are from PRISM (PRISM Climate Group, Oregon State University, prism.oregonstate.edu). Variables used in models and their correlations are indicated in bold text.

| A. Temperature               |                         |                             |                               |                               |                               |                  |                           |                                |                             |
|------------------------------|-------------------------|-----------------------------|-------------------------------|-------------------------------|-------------------------------|------------------|---------------------------|--------------------------------|-----------------------------|
|                              | <b>MAT<br/>(normal)</b> | Fall<br>temp.<br>(normal)   | Winter<br>temp.<br>(normal)   | Spring<br>temp.<br>(normal)   | Summer<br>temp.<br>(normal)   | MAT<br>(2014-15) | Fall<br>temp.<br>(2014)   | Winter<br>temp.<br>(2014-15)   | Spring<br>temp.<br>(2015)   |
| Fall temp. (normal)          | 0.97                    |                             |                               |                               |                               |                  |                           |                                |                             |
| Winter temp. (normal)        | 0.69                    | 0.83                        |                               |                               |                               |                  |                           |                                |                             |
| Spring temp. (normal)        | 0.86                    | 0.73                        | 0.23                          |                               |                               |                  |                           |                                |                             |
| Summer temp. (normal)        | 0.72                    | 0.54                        | 0.01                          | 0.94                          |                               |                  |                           |                                |                             |
| MAT (2014-2015)              | 0.71                    | 0.68                        | 0.62                          | 0.44                          | 0.48                          |                  |                           |                                |                             |
| Fall temp. (2014)            | 0.70                    | 0.75                        | 0.82                          | 0.30                          | 0.26                          | 0.95             |                           |                                |                             |
| Winter temp. (2014-2015)     | 0.60                    | 0.74                        | 0.95                          | 0.11                          | -0.04                         | 0.71             | 0.90                      |                                |                             |
| Spring temp. (2015)          | 0.28                    | 0.05                        | -0.38                         | 0.57                          | 0.78                          | 0.40             | 0.08                      | -0.35                          |                             |
| <b>Summer temp. (2015)</b>   | <b>0.25</b>             | 0.05                        | -0.24                         | 0.40                          | 0.65                          | 0.59             | 0.30                      | -0.14                          | 0.93                        |
| B. Precipitation             |                         |                             |                               |                               |                               |                  |                           |                                |                             |
|                              | <b>MAP<br/>(normal)</b> | Fall<br>precip.<br>(normal) | Winter<br>precip.<br>(normal) | Spring<br>precip.<br>(normal) | Summer<br>precip.<br>(normal) | MAP<br>(2014-15) | Fall<br>precip.<br>(2014) | Winter<br>precip.<br>(2014-15) | Spring<br>precip.<br>(2015) |
| Fall precip. (normal)        | 1.00                    |                             |                               |                               |                               |                  |                           |                                |                             |
| Winter precip. (normal)      | 1.00                    | 1.00                        |                               |                               |                               |                  |                           |                                |                             |
| Spring precip. (normal)      | 0.99                    | 0.99                        | 0.98                          |                               |                               |                  |                           |                                |                             |
| Summer precip. (normal)      | 0.92                    | 0.88                        | 0.88                          | 0.89                          |                               |                  |                           |                                |                             |
| MAP (2014-2015)              | 0.99                    | 0.99                        | 0.99                          | 0.98                          | 0.88                          |                  |                           |                                |                             |
| Fall precip. (2014)          | 0.98                    | 0.98                        | 0.98                          | 0.97                          | 0.87                          | 0.98             |                           |                                |                             |
| Winter precip. (2014-2015)   | 0.98                    | 0.98                        | 0.98                          | 0.98                          | 0.86                          | 1.00             | 0.98                      |                                |                             |
| Spring precip. (2015)        | 0.96                    | 0.97                        | 0.96                          | 0.98                          | 0.82                          | 0.98             | 0.95                      | 0.99                           |                             |
| <b>Summer precip. (2015)</b> | <b>0.13</b>             | 0.10                        | 0.11                          | 0.05                          | 0.38                          | 0.11             | 0.04                      | 0.09                           | 0.01                        |

---

C. Precipitation and temperature

---

|                              | <b>MAT<br/>(normal)</b> | Fall<br>temp.<br>(normal) | Winter<br>temp.<br>(normal) | Spring<br>temp.<br>(normal) | Summer<br>temp.<br>(normal) | MAT<br>(2014-15) | Fall<br>temp.<br>(2014) | Winter<br>temp.<br>(2014-15) | Spring<br>temp.<br>(2015) | <b>Summer<br/>temp.<br/>(2015)</b> |
|------------------------------|-------------------------|---------------------------|-----------------------------|-----------------------------|-----------------------------|------------------|-------------------------|------------------------------|---------------------------|------------------------------------|
| <b>MAP (normal)</b>          | <b>0.20</b>             | 0.30                      | 0.47                        | -0.05                       | -0.19                       | 0.23             | 0.31                    | 0.37                         | -0.18                     | <b>-0.08</b>                       |
| Fall precip. (normal)        | 0.23                    | 0.34                      | 0.53                        | -0.05                       | -0.21                       | 0.22             | 0.33                    | 0.41                         | -0.24                     | -0.14                              |
| Winter precip. (normal)      | 0.22                    | 0.33                      | 0.53                        | -0.06                       | -0.22                       | 0.22             | 0.33                    | 0.42                         | -0.25                     | -0.15                              |
| Spring precip. (normal)      | 0.30                    | 0.37                      | 0.52                        | 0.03                        | -0.10                       | 0.34             | 0.41                    | 0.42                         | -0.09                     | 0.03                               |
| Summer precip. (normal)      | -0.08                   | -0.04                     | 0.09                        | -0.17                       | -0.21                       | 0.04             | 0.03                    | 0.01                         | 0.01                      | 0.09                               |
| MAP (2014-2015)              | 0.25                    | 0.34                      | 0.51                        | -0.02                       | -0.16                       | 0.28             | 0.37                    | 0.43                         | -0.19                     | -0.07                              |
| Fall precip. (2014)          | 0.28                    | 0.37                      | 0.50                        | 0.04                        | -0.13                       | 0.21             | 0.30                    | 0.38                         | -0.18                     | -0.12                              |
| Winter precip. (2014-2015)   | 0.28                    | 0.37                      | 0.53                        | 0.00                        | -0.14                       | 0.31             | 0.40                    | 0.46                         | -0.18                     | -0.06                              |
| Spring precip. (2015)        | 0.34                    | 0.43                      | 0.61                        | 0.02                        | -0.12                       | 0.40             | 0.49                    | 0.53                         | -0.17                     | -0.02                              |
| <b>Summer precip. (2015)</b> | <b>-0.84</b>            | -0.80                     | -0.51                       | -0.79                       | -0.67                       | -0.50            | -0.48                   | -0.39                        | -0.28                     | <b>-0.17</b>                       |

---

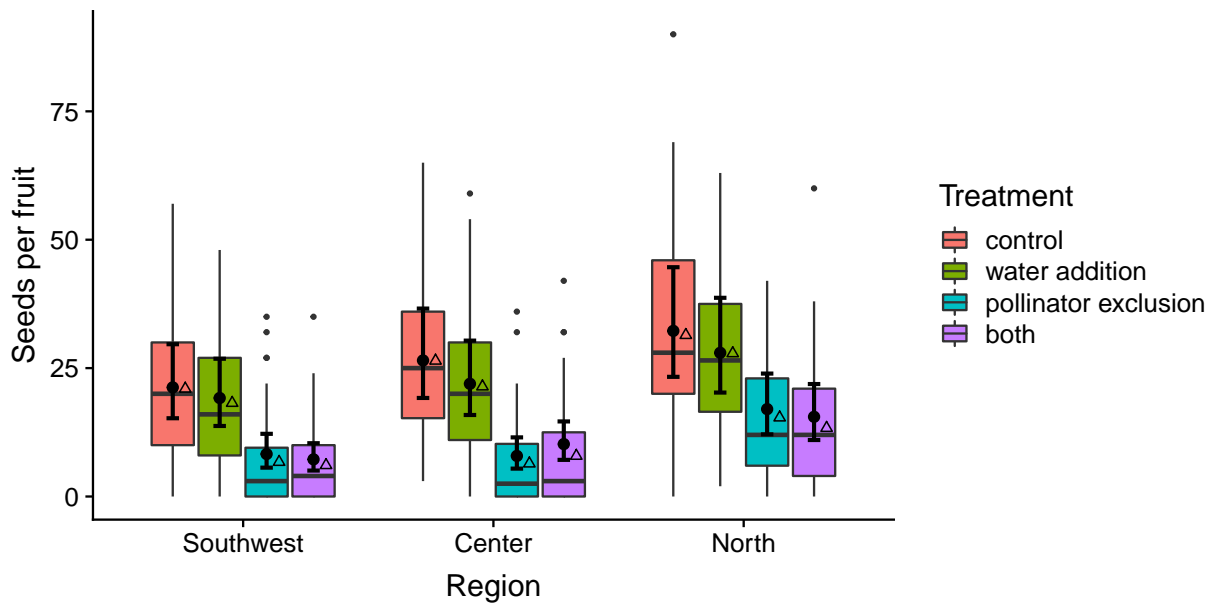

**Fig. S1.** Seeds per fruit in plots with factorial pollinator exclusion and water addition treatments in each of three geographic regions within the range of *Clarkia pulchella*. Boxplots show the median, first and third quartiles, and range of the raw data; black points and error bars show the model-fitted means and 95% confidence intervals; open triangles are raw means of the data. Despite a statistically significant interaction between pollinators and water addition (analyses not shown), the biological effect of watering on seed set appears negligible.

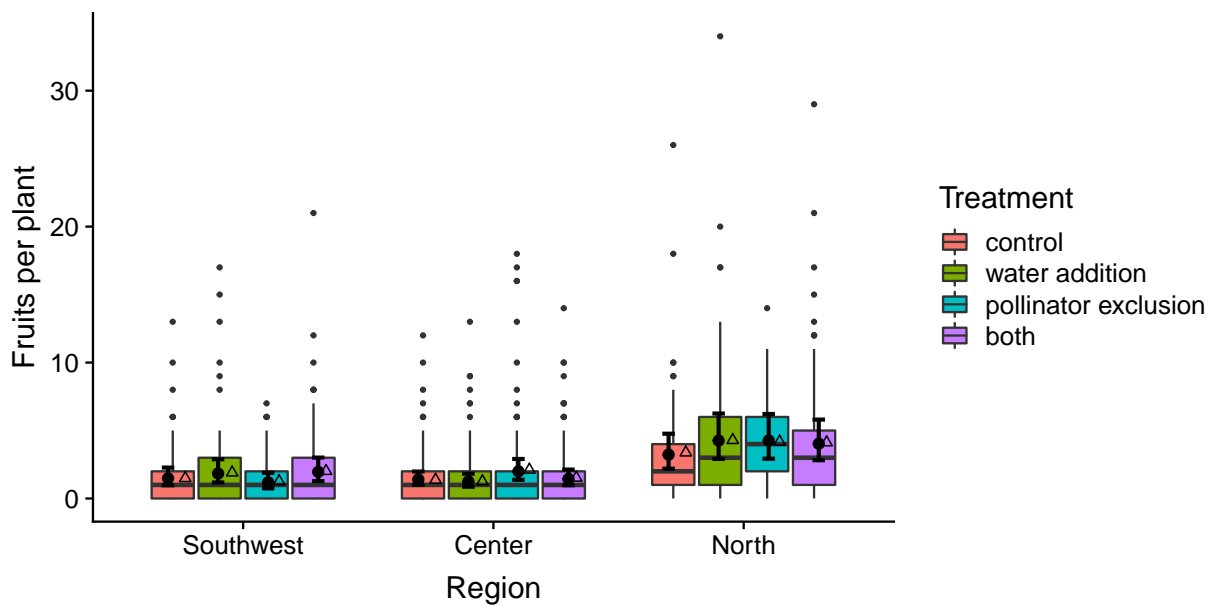

**Fig. S2.** Fruits per plant in plots with factorial pollinator exclusion and water addition treatments in each of three geographic regions within the range of *Clarkia pulchella*. Boxplots show the median, first and third quartiles, and range of the raw data; black points and error bars show the model-fitted means and 95% confidence intervals; open triangles are raw means of the data. Despite statistically significant interactions between pollinators and water addition, as well as between region and water addition (analyses not shown), the biological effect of watering on fruit number appears negligible.
